# Supplementary material for: SMLFire1.0: a stochastic machine learning (SML) model for wildfire activity in the western United States
Source: Copernicus journal article supplement (doi:10.5194/gmd-16-3407-2023), 2023-06-19
Supplement: Supplementary file 1 [file gmd-16-3407-2023-supplement.pdf]

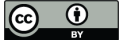

*Supplement of*

## **SMLFire1.0: a stochastic machine learning (SML) model for wildfire activity in the western United States**

**Jatan Buch et al.**

*Correspondence to:* Jatan Buch (jb4625@columbia.edu)

The copyright of individual parts of the supplement might differ from the article licence.

| Divisions                     | Ecoregion                   | Level III Ecoregions      | Total number of fires | Total area burned [in km <sup>2</sup> ] |
|-------------------------------|-----------------------------|---------------------------|-----------------------|-----------------------------------------|
| Forests                       | Sierra Nevada               | (4, 5, 9); CA             | 824                   | 18428                                   |
|                               | California (CA) North Coast | (1, 78); CA               | 437                   | 17354                                   |
|                               | CA Central Coast            | (6); CA                   | 1105                  | 17273                                   |
|                               | CA South Coast              | (8, 85); CA               | 867                   | 17111                                   |
|                               | Pacific Northwest Mountains | (1, 4, 9, 77, 78); WA, OR | 579                   | 21673                                   |
|                               | Northern Rockies            | (15, 41)                  | 534                   | 11599                                   |
|                               | Middle Rockies              | (11, 16)                  | 1947                  | 49983                                   |
|                               | Southern Rockies            | (19, 21)                  | 570                   | 12961                                   |
|                               | AZ/NM Mountains             | (23, 79)                  | 1547                  | 33106                                   |
|                               | Deserts                     | AM Semidesert             | (14, 81)              | 837                                     |
| Intermountain (IM) Semidesert |                             | (12, 18, 80)              | 3054                  | 67324                                   |
| IM Desert                     |                             | (13)                      | 2248                  | 41525                                   |
| Chihuahuan (CH) Desert        |                             | (24)                      | 290                   | 2557                                    |
| Columbia Plateau              |                             | (10)                      | 793                   | 17235                                   |
| Colorado Plateau              |                             | (20, 22)                  | 735                   | 6315                                    |
| Southwestern Tablelands       |                             | (26)                      | 334                   | 5044                                    |
| Northern Great Plains         |                             | (42, 43); MT, WY          | 1121                  | 17526                                   |
| High Plains                   |                             | (25)                      | 296                   | 5498                                    |
| Plains                        |                             |                           |                       |                                         |
|                               |                             |                           |                       |                                         |

**Table S1.** Summary of the Bailey's ecoregions and divisions used in our analysis. The constituent Level III (L3) ecoregions, referenced by their respective US\_L3code, for each "Ecoregion" are outlined alongside state boundaries, wherever applicable. For example, the Northern Great Plains Ecoregion consists of three L3 ecoregions with US\_L3codes 42 and 43 within the states of Montana (MT) and Wyoming (WY). Also shown are the total number of fires as well as total area burned (rounded up to the nearest integer) from 1984 to 2020 for each Ecoregion.

| Predictor type           | Identifier                       | Description                                                     | Resolution | Timescale | Source             |
|--------------------------|----------------------------------|-----------------------------------------------------------------|------------|-----------|--------------------|
| Climate and fire weather | VPD                              | Mean vapor pressure deficit                                     | 5 km       | Monthly   | Climgrid and PRISM |
|                          | AntVPD <sub>Mmon</sub>           | Average VPD in $M$ antecedent months;<br>$M \in \{2, 3, 4\}$    | 5 km       | Monthly   | Climgrid           |
|                          | VPD <sup>max</sup> <sub>X</sub>  | Maximum $X$ -day running average of VPD;<br>$X \in \{3, 5, 7\}$ | 9 km       | Monthly   | UCLA-ERA5          |
|                          | Tmax                             | Daily maximum temperature                                       | 5 km       | Monthly   | Climgrid           |
|                          | AntTmax <sub>Mmon</sub>          | Average maximum temperature in $M$<br>antecedent months         | 5 km       | Monthly   | Climgrid           |
|                          | Tmax <sup>max</sup> <sub>X</sub> | Maximum $X$ -day running average of Tmax                        | 9 km       | Monthly   | UCLA-ERA5          |
|                          | Tmin                             | Daily minimum temperature                                       | 5 km       | Monthly   | Climgrid           |
|                          | Tmin <sup>max</sup> <sub>X</sub> | Maximum $X$ -day running average of Tmin                        | 9 km       | Monthly   | UCLA-ERA5          |
|                          | Prec                             | Precipitation total                                             | 5 km       | Monthly   | Climgrid           |
|                          | AntPrec <sub>Mmon</sub>          | Average precipitation total in $M$ antecedent<br>months         | 5 km       | Monthly   | Climgrid           |
|                          | AntPrec <sub>lag1</sub>          | Mean annual precipitation in lag year 1                         | 5 km       | Annual    | Climgrid           |
|                          | AntPrec <sub>lag2</sub>          | Mean annual precipitation in lag year 2                         | 5 km       | Annual    | Climgrid           |
|                          | SWE <sub>mean</sub>              | Mean snow water equivalent                                      | 500 m      | Monthly   | NSIDC              |
|                          | SWE <sub>max</sub>               | Daily maximum snow water equivalent                             | 500 m      | Monthly   | NSIDC              |
|                          | AvgSWE <sub>Mmon</sub>           | Average snow water equivalent in $M$<br>antecedent months       | 500 m      | Monthly   | NSIDC              |
| FM1000                   | 1000-hour dead fuel moisture     | 4 km                                                            | Monthly    | gridMET   |                    |
| FFWI                     | Fosberg Fire Weather Index       | 9 km                                                            | Monthly    | UCLA-ERA5 |                    |

| Predictor type | Identifier             | Description                                                                        | Resolution | Timescale | Source            |
|----------------|------------------------|------------------------------------------------------------------------------------|------------|-----------|-------------------|
|                | FFWI <sup>max</sup> X  | Maximum $X$ -day running average of Fosberg Fire Weather Index                     | 9 km       | Monthly   | UCLA-ERA5         |
|                | Wind                   | Monthly mean wind speed                                                            | 9 km       | Monthly   | UCLA-ERA5         |
|                | Wind <sup>1max</sup> X | Maximum $X$ -day running average of wind speed                                     | 9 km       | Monthly   | UCLA-ERA5         |
|                | Lightning              | Lightning strike density                                                           | 500 m      | Monthly   | NLDN              |
| Vegetation     | Forest                 | Fraction of forest landcover                                                       | 30 m       | Annual    | NLCD              |
|                | Grassland              | Fraction of grassland cover                                                        | 30 m       | Annual    | NLCD              |
|                | Shrubland              | Fraction of shrubland cover                                                        | 30 m       | Annual    | NLCD              |
|                | Biomass                | Aboveground biomass map                                                            | 300 m      | Static    | Spawn et al. 2020 |
| Human          | Camp_num               | Mean number of camp grounds                                                        | 1km        | Static    | Open source       |
|                | Camp_dist              | Mean distance from nearest camp ground                                             | 1km        | Static    | Open source       |
|                | Road_dist              | Mean distance from nearest highway                                                 | 1km        | Static    | Open source       |
|                | Popdensity             | Mean population density                                                            | 1km        | Annual    | SILVIS            |
|                | Pop10_dist             | Distance from nearest area with population density $> 10\text{people}/\text{km}^2$ | 1km        | Annual    | SILVIS            |
| Topography     | Housedensity           | Mean housing density                                                               | 1km        | Annual    | SILVIS            |
|                | Slope                  | Mean slope                                                                         | 1m         | Static    | USGS              |
|                | Southness              | Mean south-facing degree of slope                                                  | 1m         | Static    | USGS              |

**Table S2:** Summary table for all input predictors organized by type, identifier, description, spatial resolution of raw data, timescale, and source. All predictors are aggregated to a 12 km spatial resolution while performing the statistical analysis. Considering each predictor's  $M$  antecedent month average and maximum  $X$ -day running average components as distinct predictors, the total number of predictors adds up to 51.

| Predictors                                                           | Qualitative effect |           | Comments                                                                                                                                                                     |
|----------------------------------------------------------------------|--------------------|-----------|------------------------------------------------------------------------------------------------------------------------------------------------------------------------------|
|                                                                      | Fire frequency     | Fire size |                                                                                                                                                                              |
| VPD, AntVPD <sub>Mmon</sub> ,<br>VPD <sup>maxX</sup>                 | ↑                  | ↑         | VPD on multiple timescales, from weekly to seasonal, is positively correlated with both fire frequency and size                                                              |
| Tmax, AntTmax <sub>Mmon</sub> ,<br>Tmax <sup>maxX</sup>              | ↑                  | ↑         | Tmax on multiple timescales, from weekly to seasonal, is positively correlated with both fire frequency and size                                                             |
| Tmin, Tmin <sup>maxX</sup>                                           | /                  | ↑         | Both extreme Tmin and monthly mean Tmin are positively correlated with fire size; Tmin is not a significant predictor for fire frequency                                     |
| Prec, AntPrec <sub>Mmon</sub>                                        | ↓                  | ↓         | Prec on multiple timescales, from weekly to seasonal, is negatively correlated with both fire frequency and size.                                                            |
| AntPrec <sub>lag1</sub> , AntPrec <sub>lag2</sub>                    | ↑                  | ↑         | Annual mean of Prec in lagging years, a proxy for biomass growth, is positively correlated with fire frequency and size.                                                     |
| SWE <sub>mean</sub> , AvgSWE <sub>Mmon</sub> ,<br>SWE <sub>max</sub> | ↓                  | ↓         | Snow water equivalent on multiple timescales, from weekly to seasonal, is negatively correlated with both fire frequency and size                                            |
| FM1000                                                               | ↓                  | ↓         | 1000-hour dead fuel moisture is negatively correlated with fire frequency and size                                                                                           |
| FFWI, FFWI <sup>maxX</sup>                                           | ↑                  | ↑         | Mean and extreme values of FFWI are positively correlated with fire frequency and size                                                                                       |
| Wind <sup>maxX</sup>                                                 | /                  | ↑         | Monthly maxima of X-day mean wind speed is positively correlated with fire size; wind speed is not a significant predictor for fire frequency                                |
| Biomass                                                              | ↕                  | ↑         | Spatial variance in biomass is positively correlated with fire size, however its effect on fire frequency is ambiguous with potential confounding by human action predictors |
| Grassland, Shrubland                                                 | ↑                  | ↑         | Fraction of grassland and shrubland cover increases fuel flammability and continuity over a landscape, and is thus positively correlated with fire frequency and fire size   |

|            |   |   |                                                                                                                                                                                                                                                                                                              |
|------------|---|---|--------------------------------------------------------------------------------------------------------------------------------------------------------------------------------------------------------------------------------------------------------------------------------------------------------------|
| Lightning  | ↑ | / | Increased lightning strike density contributes additional ignitions, and is positively correlated with fire frequency; Lightning is not a significant predictor of fire size                                                                                                                                 |
| Slope      | ↑ | ↑ | Slope is positively correlated with fire frequency and size since the rate of fire spread is proportional to the degree of slope                                                                                                                                                                             |
| Southness  | ↑ | ↑ | Southness, or mean south-facing degree of slope, dictates the level of solar insolation and is positively correlated with fire frequency and size                                                                                                                                                            |
| Pop10_dist | ↕ | ↑ | Increased distance from areas with population density greater than 10 km <sup>2</sup> is a correlate of remoteness leading to a larger fire size. Its effect on fire frequency is ambiguous since remote areas experience fewer ignitions while also having reduced access to early fire containment efforts |

**Table S3:** Summary of the physical meaning of important model predictors as well as their qualitative effect on fire frequency and size. The symbols ↑, ↓, ↕, and / refer to positive, negative, ambiguous, and insignificant correlations between a predictor and fire response variable respectively.

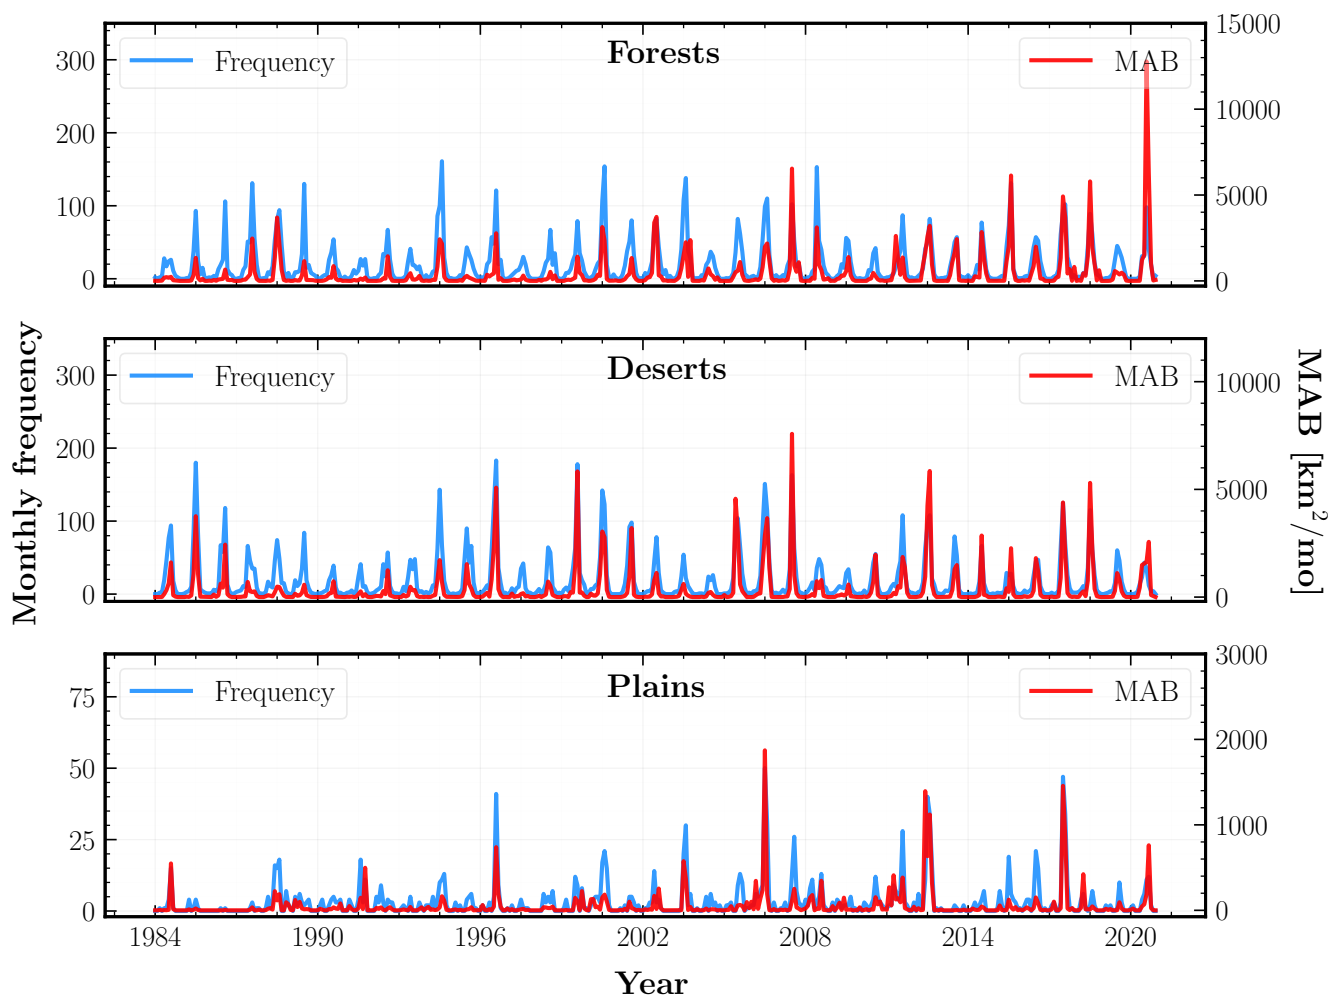

**Figure S1.** Observed monthly fire frequencies (blue) and monthly area burned (MAB) (red) for each of the ecological Divisions: Forests (top panel), Deserts (middle), and Plains (bottom).

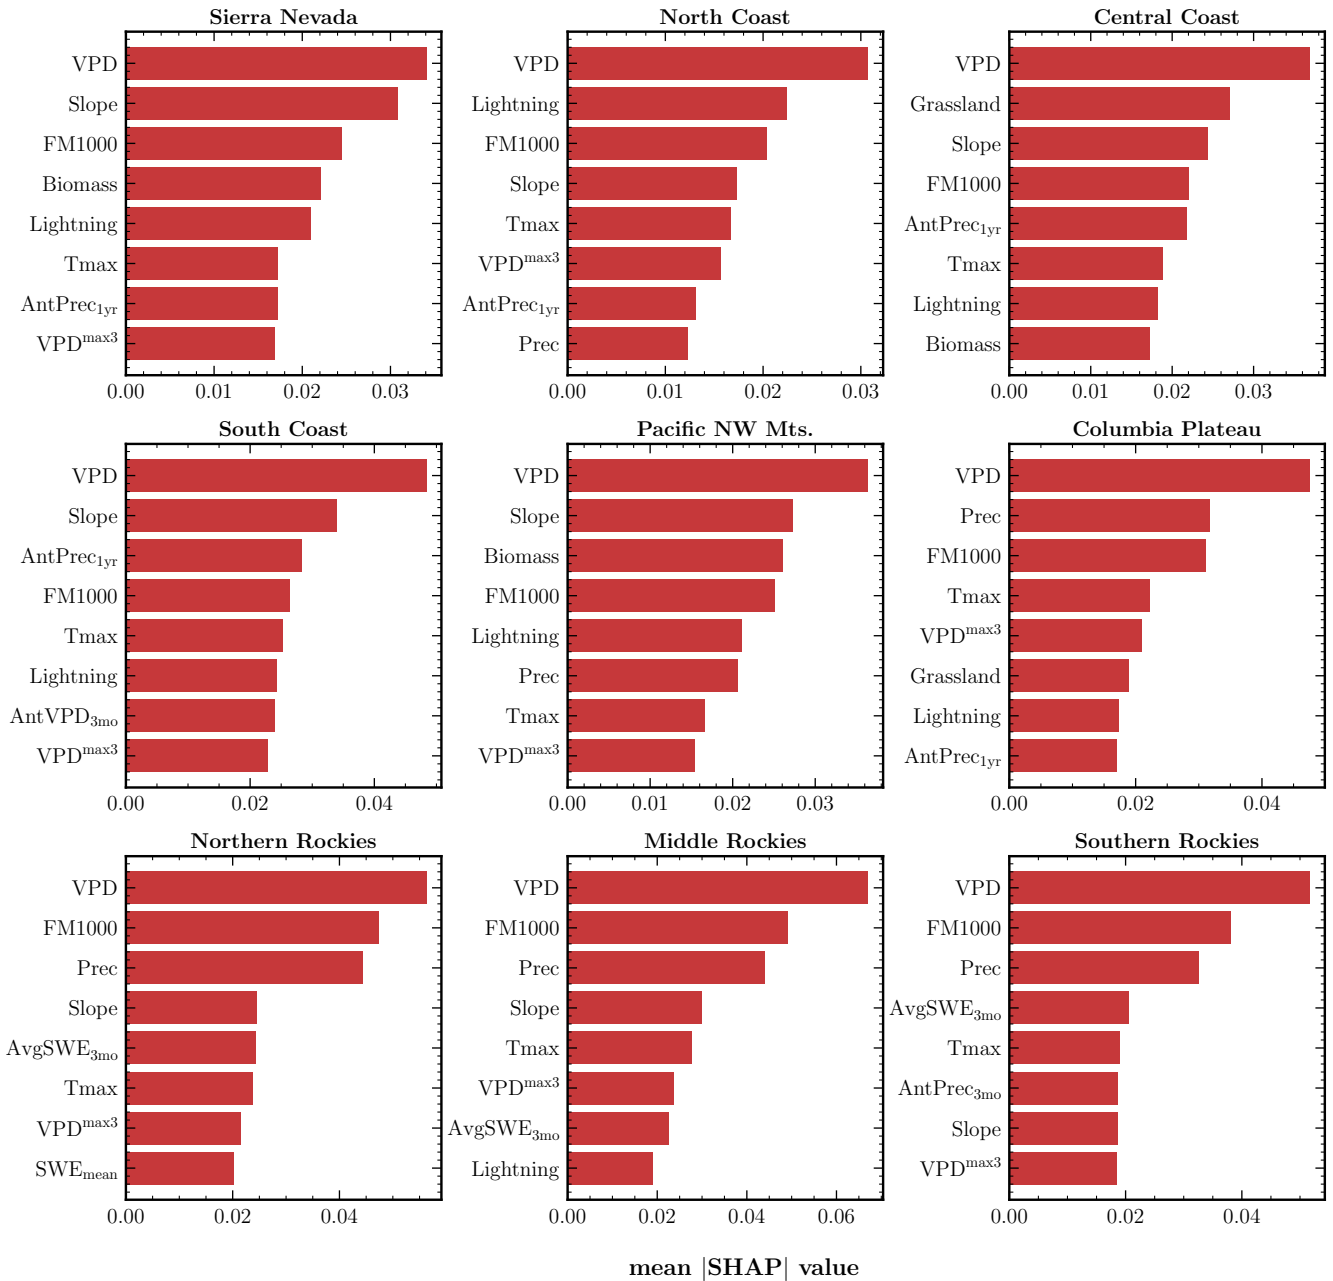

**Figure S2.** Mean SHAP values for the top 8 input predictors per Ecoregion of our zero-inflated Poisson distribution (ZIPD) frequency Mixture Density Network (MDN). These include all the CA Ecoregions: Sierra Nevada, North, Central, and South Coasts; Pacific NW Mountains; Columbia Plateau; and North, Middle, and Southern Rockies.



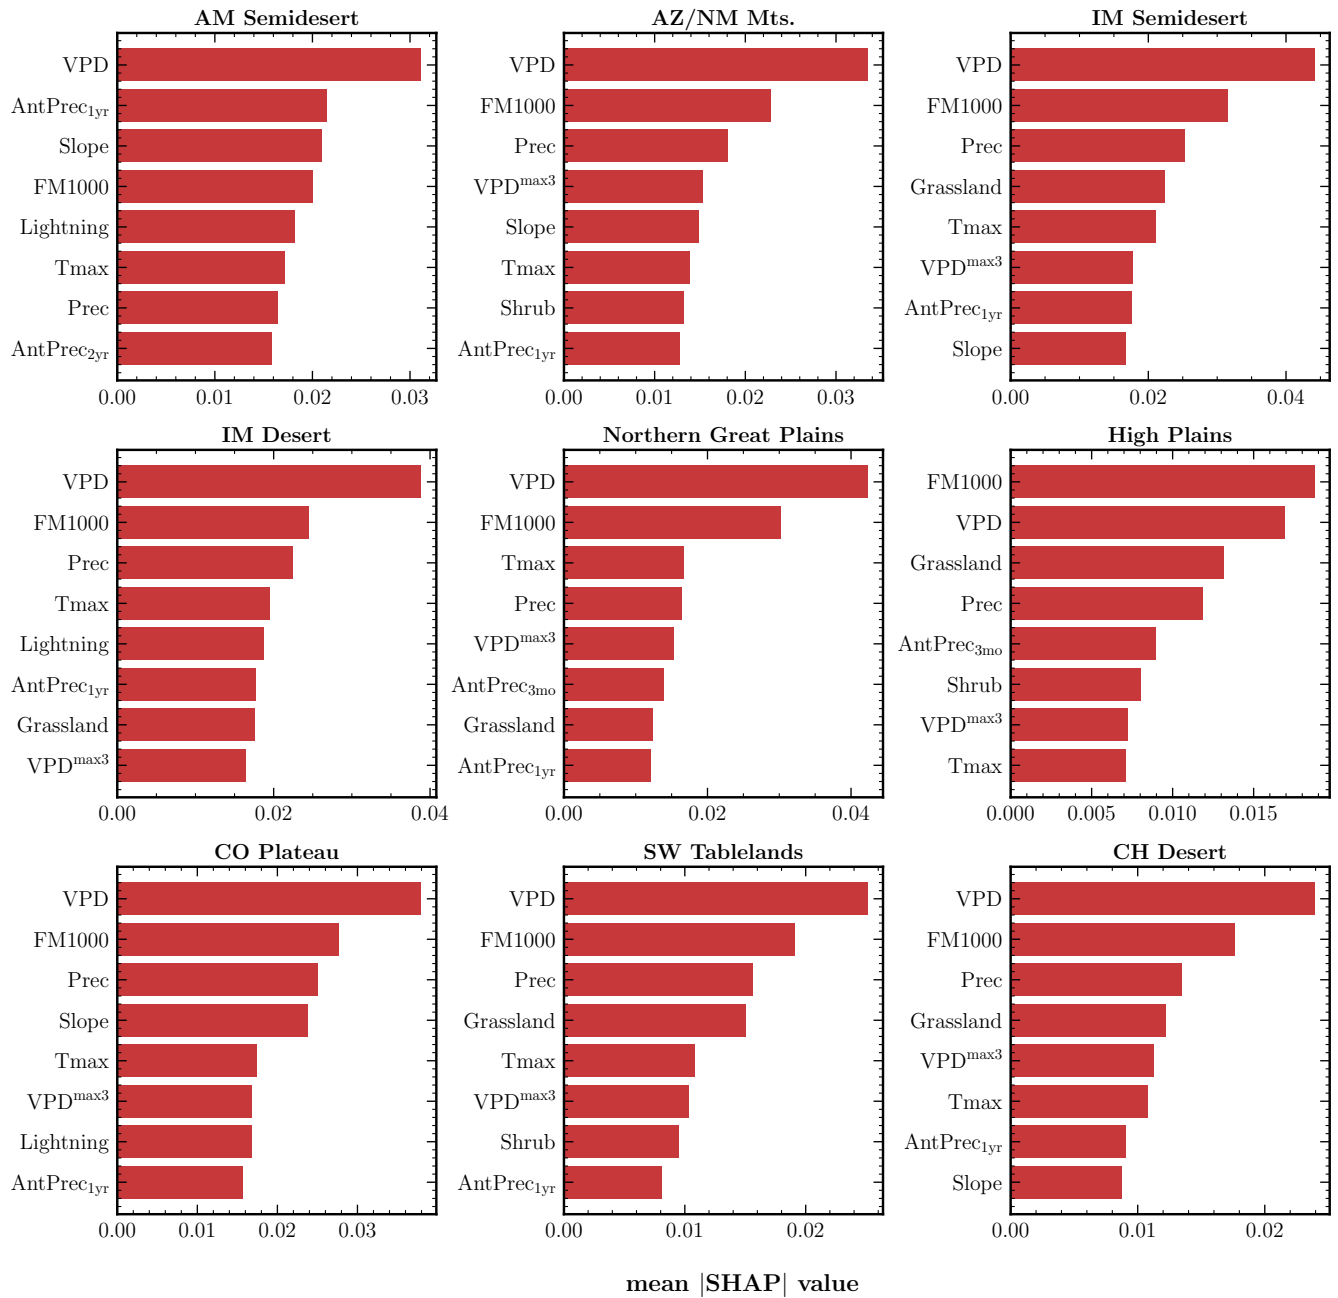

**Figure S3.** As in Fig. S2, but for the remaining WUS Ecoregions: American (AM) and Intermountain (IM) Semideserts, Arizona/New Mexico (AZ/NM) Mountains; Chihuahuan (CH) and IM Deserts; Northern Great and High Plains; Colorado (CO) Plateau; and Southwestern Tablelands.

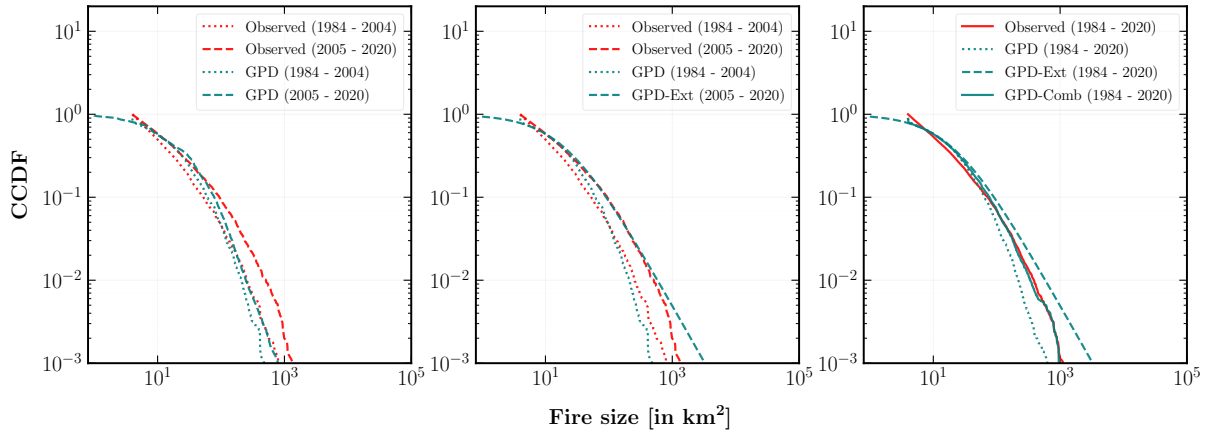

**Figure S4.** Complementary cumulative distribution function (CCDF) of the fire size MDN for three different cases. *Left:* CCDFs of the unweighted GPD MDN simulations (green) are plotted with those of observed (red) fire sizes ( $\geq 4\text{km}^2$ ) from 1984-2004 (dotted) and 2005-2020 (dashed). *Middle:* CCDFs of the unweighted Generalized Pareto distribution (GPD) MDN (green, dotted) and weighted GPD (GPD-Ext) MDN simulations (green, dashed) with MDNs trained on data from 1984-2020 but plotted alongside the CCDFs of observed sizes from 1984-2004 and 2005-2020 respectively; also shown are the CCDFs for observed sizes following the legend in the previous panel. *Right:* CCDFs of the unweighted (green, dotted), weighted (green, dashed), and combined (green, solid) GPD MDN simulations alongside the CCDF of observed (red, solid) sizes from 1984-2020; the breakpoint for the combined GPD predictions is set after 2004.

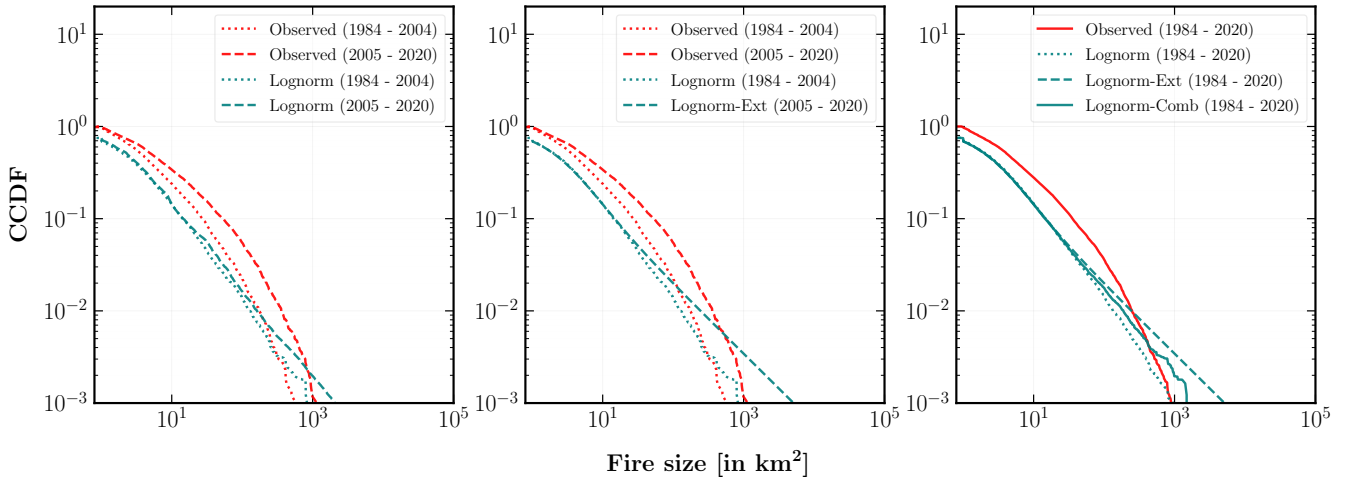

**Figure S5.** As in Fig. S4, but with a lognormal loss function for the MDN. Unlike the GPD, the lognormal distribution does not require a threshold on fire sizes.

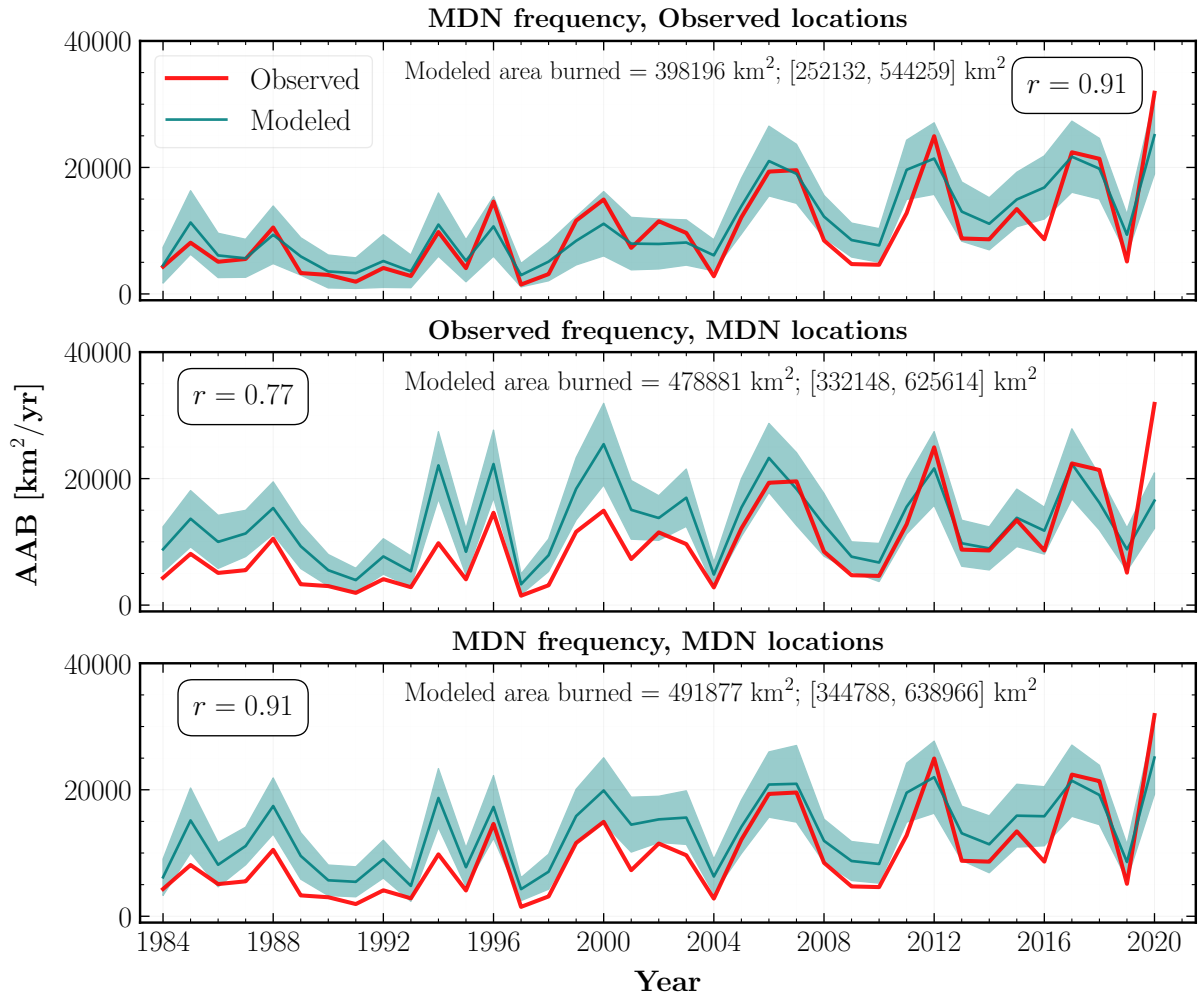

**Figure S6.** Cumulative observed (red) and modeled (teal) annual area burned (AAB) across the western United States from 1984 to 2020 for different combinations of fire frequencies and locations. The upper and lower panels show the AAB derived using modeled frequencies from the ZIPD MDN for each Ecoregion along with fire sizes simulated from the combined GPD model evaluated at observed and model fire locations respectively; the middle panel shows the AAB computed as above except with observed frequencies and model locations. The teal shaded regions indicate  $1\sigma$  uncertainty intervals for the modeled area burned aggregated over the Monte Carlo (MC) simulations of all constituent fires. The mean total area burned over the study period as well as its  $1\sigma$  uncertainty interval are indicated at the top of each panel.

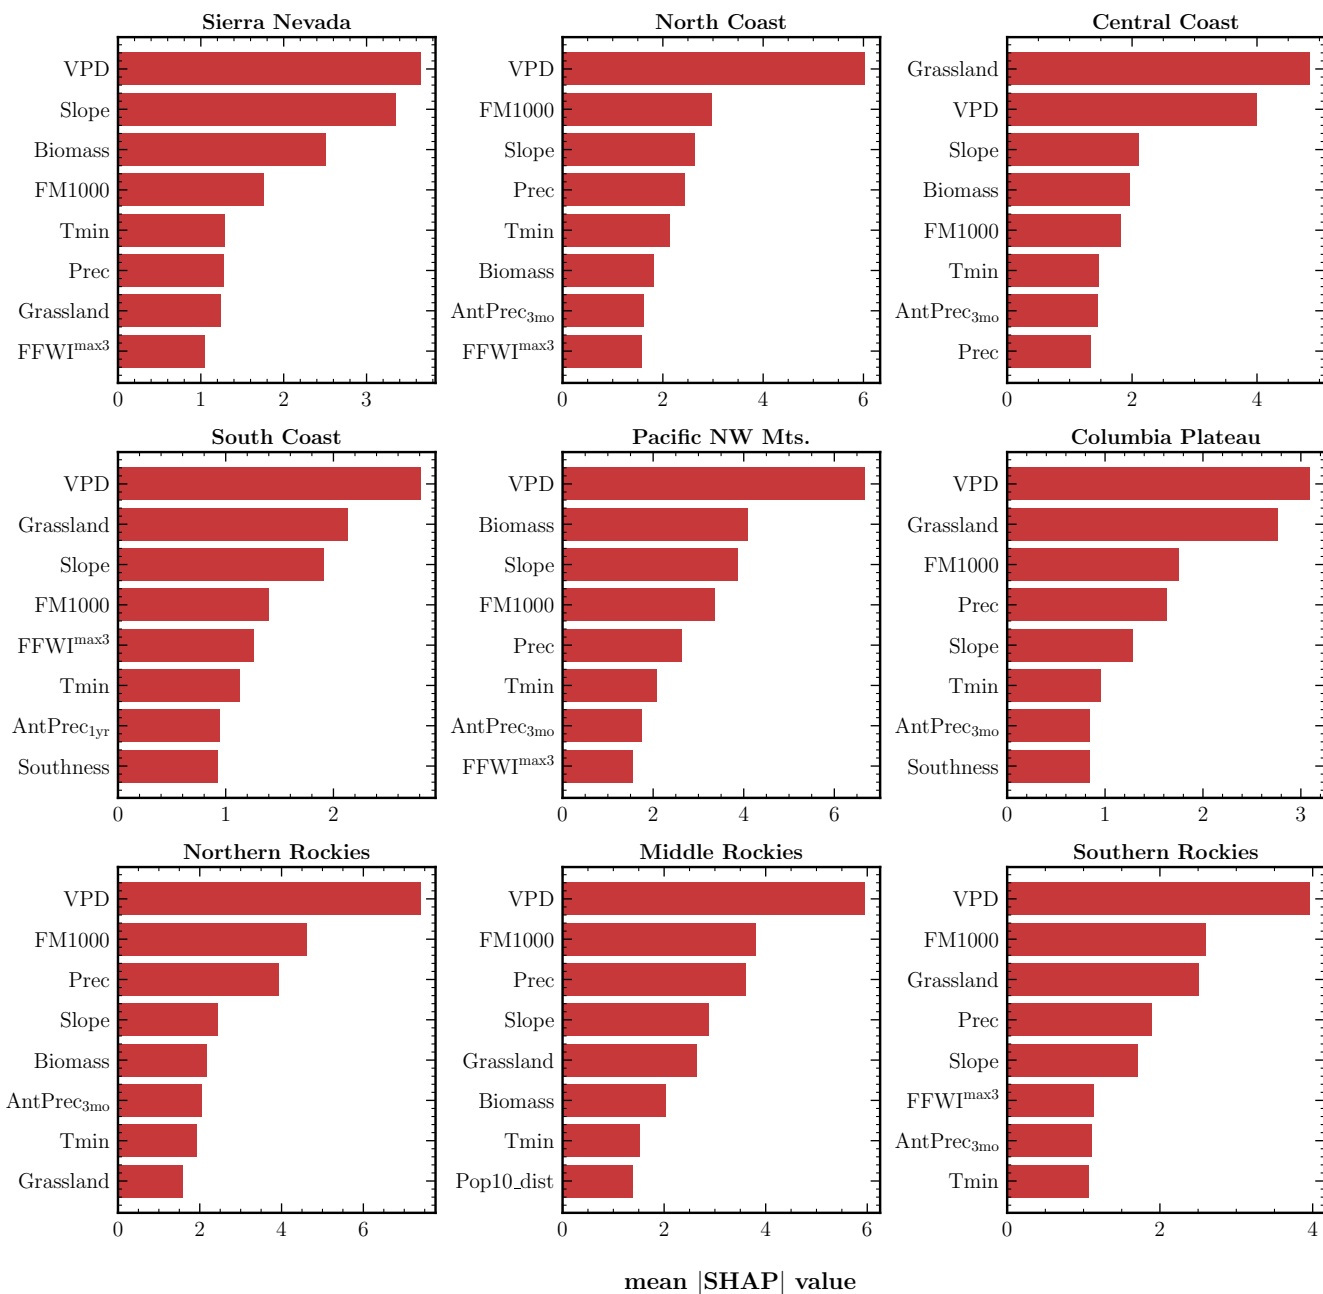

**Figure S7.** Mean SHAP values for the top 8 input predictors per ecoregion of the GPD size MDN. These include all the CA Ecoregions: Sierra Nevada, North, Central, and South Coasts; Pacific NW Mountains; Columbia Plateau; and North, Middle, and Southern Rockies.

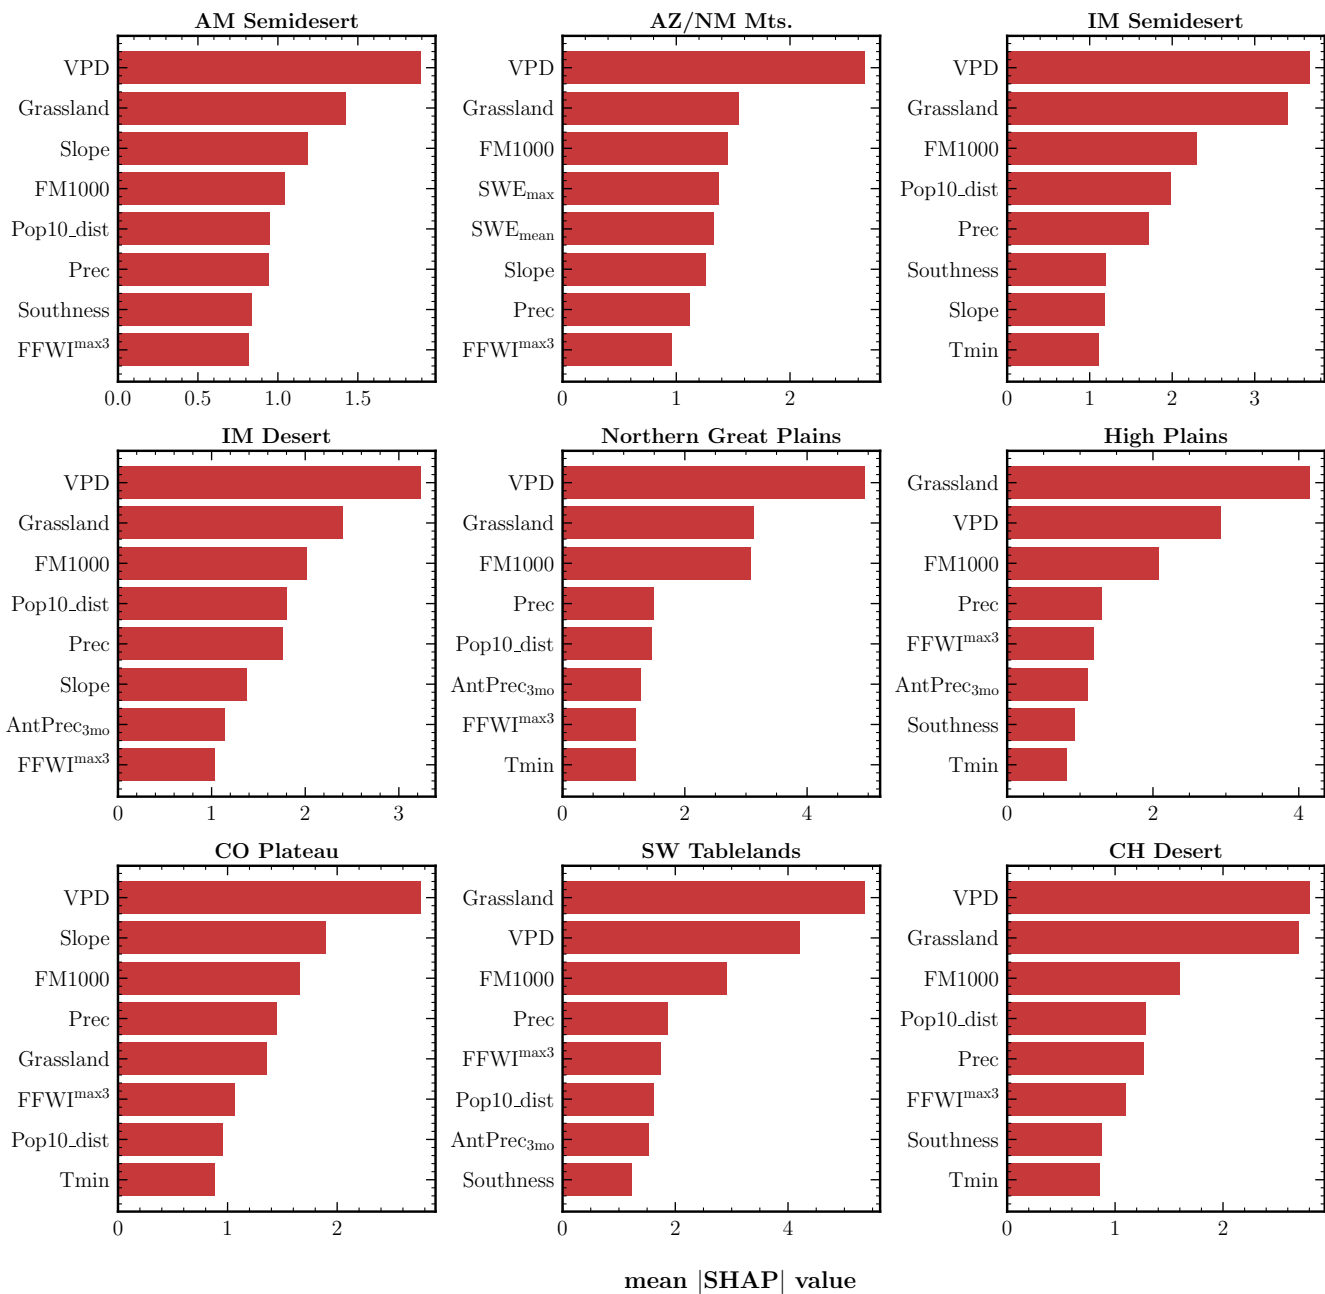

**Figure S8.** As in Fig. S7, but for the remaining WUS Ecoregions: American (AM) and Intermountain (IM) Semideserts, Arizona/New Mexico (AZ/NM) Mountains; Chihuahuan (CH) and IM Deserts; Northern Great and High Plains; Colorado (CO) Plateau; and Southwestern Tablelands.

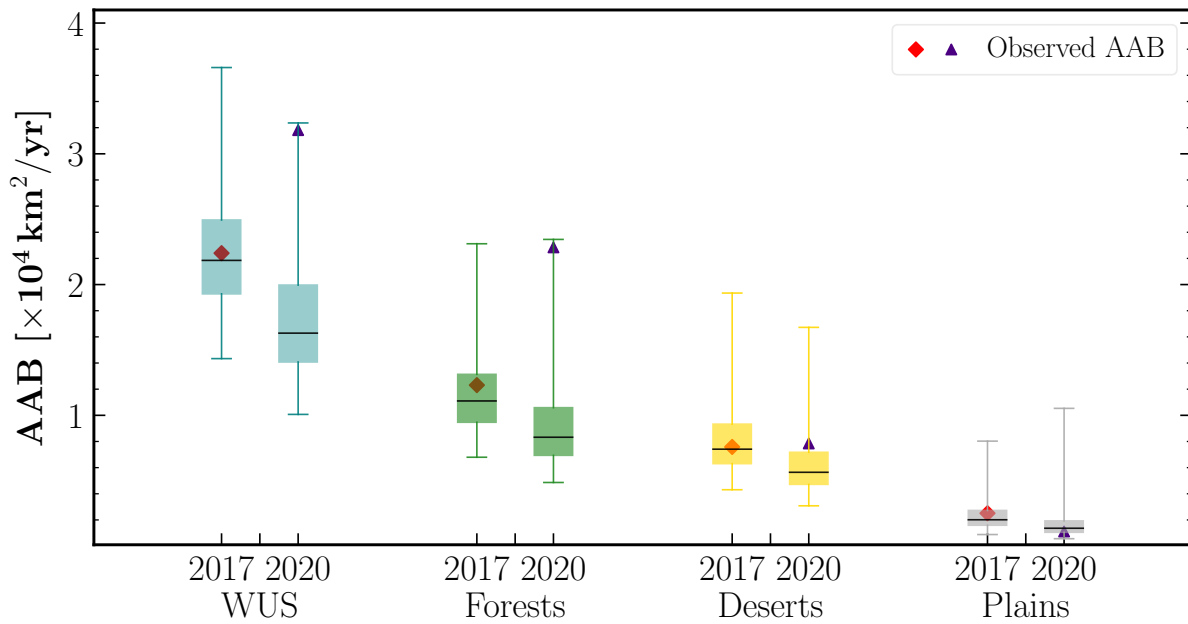

**Figure S9.** Boxplots of modeled annual area burned (AAB) for two extreme fire years, 2017 and 2020, for the entire western United States (WUS) (teal) and three Divisions organized by their primary vegetation types: Forests (green), Deserts (yellow), and Plains (gray). The lower and upper whiskers of each boxplot indicate the 0.5<sup>th</sup> and 99.5<sup>th</sup> percentile of the predicted AAB distribution, whereas the horizontal black line represents its median value. Also shown for reference are the observed AAB for both 2017 (red diamond) and 2020 (indigo triangle).

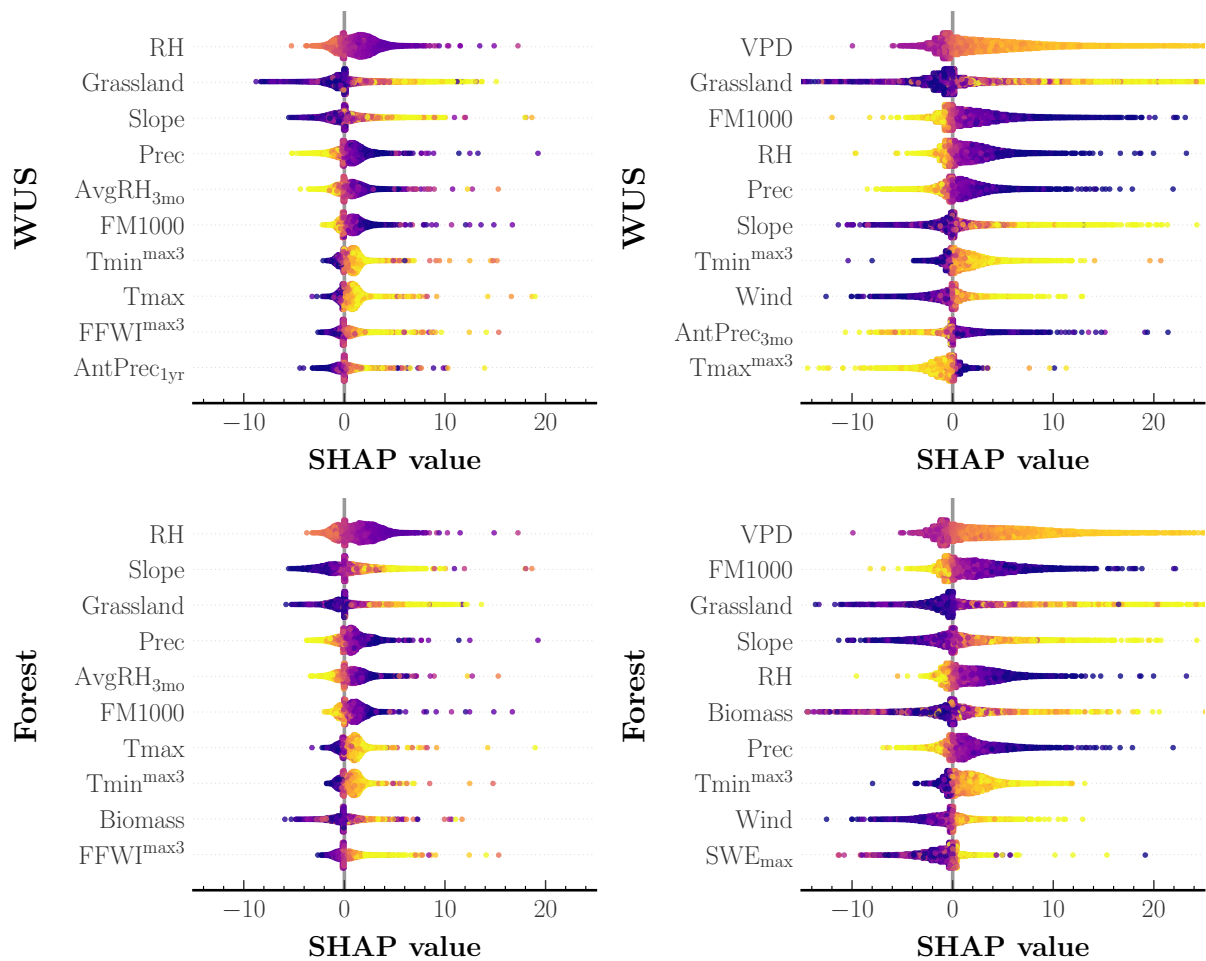

**Figure S10.** SHapley Additive exPlanation (SHAP) analysis of the fire size MDN model outputs for different sets of input predictors. *Left column:* SHAP summary plots with relative humidity (RH) and average RH over 3 antecedent months ( $\text{AvgRH}_{3\text{mo}}$ ) predictors instead of their VPD counterparts for the entire WUS (top panel) and Forest Division (bottom). *Right column:* SHAP summary plots with both VPD and RH predictors as well as their antecedent counterparts for the entire WUS (top panel) and Forest Division (bottom). Each colored point along the  $x$ -axis represents an individual prediction with the color corresponding to high (yellow) or low (indigo) values of the respective input predictor.
